# Supplementary material for: Iodine uptake and enhanced electrical conductivity in a porous coordination polymer based on cucurbit[6]uril
Source: Royal Society of Chemistry journal article supplement (doi:10.1039/c6qi00305b), 2016-01-01
Supplement: c6qi00305b1.pdf [file c6qi00305b1.pdf]

## Supporting information

### **Iodine uptake and enhanced electrical conductivity in a porous coordination polymer based on cucurbit[6]uril**

Jing-Xiang Lin <sup>a,b</sup>, Jun Liang<sup>a</sup>, Ji-Fei Feng <sup>a</sup>, Bahar Karadeniz<sup>c</sup>, Jian Lü<sup>a,c,\*</sup> and Rong Cao<sup>a,\*</sup>

---

<sup>a</sup> State Key Laboratory of Structural Chemistry, Fujian Institute of Research on the Structure of Matter, Chinese Academy of Sciences, Fuzhou 350002, China;

<sup>b</sup> The School of Ocean Science and Biochemistry Engineering, Fuqing Branch of Fujian Normal University; Fuqing, 350300, the People's Republic of China;

<sup>c</sup> School of Chemistry, University of Nottingham, University Park, Nottingham NG7 2RD, UK.

\*Corresponding authors: [lujian05@fjirsm.ac.cn](mailto:lujian05@fjirsm.ac.cn) (J.L.); [rcao@fjirsm.ac.cn](mailto:rcao@fjirsm.ac.cn) (R.C.).

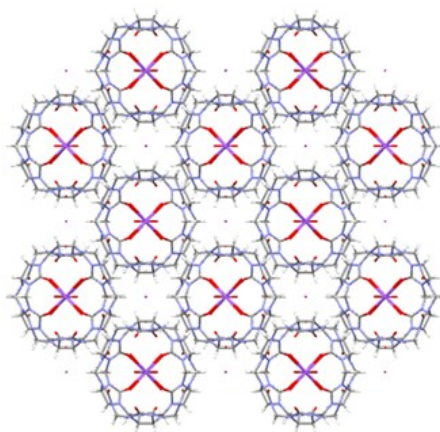

**Fig. S1.** Packing view of complex **1** along *b* axis.

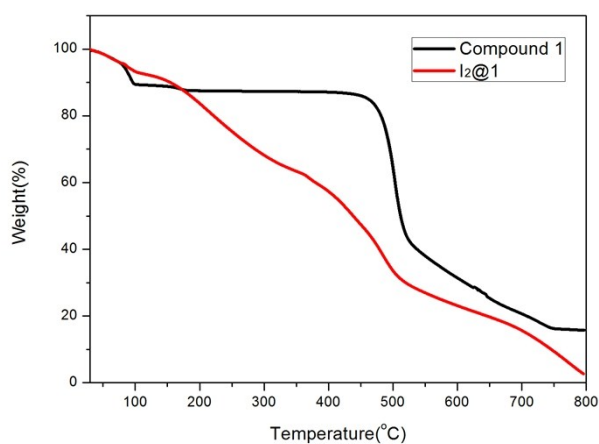

**Fig. S2.** TG curve of complex **1** (black) and I<sub>2</sub>@**1** (red).

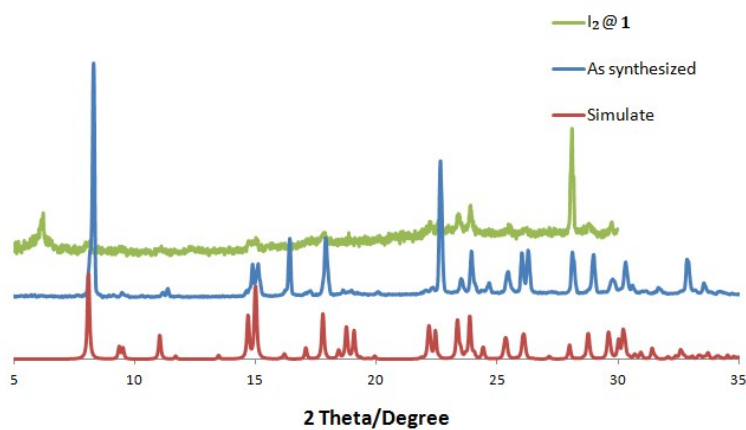

**Fig. S3.** PXRD of complex **1** simulated from single crystal structure (red), as synthesized sample (blue), and I<sub>2</sub>@**1** after iodine uptake (green). The characteristics of red and blue patterns are slightly shifted from each other, due to the fact that the crystal structure was measured at 100 K, while the experimental PXRD pattern was recorded at room temperature.
